# Supplementary material for: Shortwave UV Blue Luminescence of Some Minerals and Gems Due to Titanate Groups
Source: MDPI journal article supplement (doi:10.3390/min13010104), 2023-01-09
Supplement: s1 [file s1]

Supplementary information:

**Table S1.** Mineral and synthetic compounds on which Ti-related blue luminescence (possibly BSL) has been described or inferred [1,27,29,39,79,83,88–101].

| Mineral/compound                                                                                                    | Emission (FWHM) nm         | Lifetime decay | Proposed cause                                 | Reference |
|---------------------------------------------------------------------------------------------------------------------|----------------------------|----------------|------------------------------------------------|-----------|
| Ba <sub>2</sub> TiP <sub>2</sub> O <sub>9</sub>                                                                     | 490 (150)                  |                | TiO <sub>6</sub>                               | [88]      |
| BaTiO <sub>3</sub>                                                                                                  | 490 (150)                  |                | TiO <sub>6</sub>                               | [89]      |
| CaTiO <sub>3</sub>                                                                                                  | 450 (100)                  |                | TiO <sub>x</sub> x= 5,6                        | [90]      |
| KTiPO <sub>5</sub>                                                                                                  | 390                        |                |                                                | [83]      |
| LaNbTiO <sub>6</sub>                                                                                                | 470 (50)                   |                | TiO <sub>6</sub>                               | [91]      |
| Na <sub>0.5</sub> Bi <sub>0.5</sub> TiO <sub>3</sub>                                                                | 445 (120)                  |                | TiO <sub>6</sub>                               | [92]      |
| Alkali feldspars                                                                                                    | 460                        |                | Ti <sup>4+</sup>                               | [93]      |
| KAlSi <sub>3</sub> O <sub>8</sub>                                                                                   |                            |                |                                                |           |
| Cassiterite                                                                                                         |                            |                |                                                |           |
| SnO <sub>2</sub>                                                                                                    | 440 (100)                  | 0.05 μs        | Ti or W                                        | [29,79]   |
| Catapleiite                                                                                                         |                            |                |                                                |           |
| Na <sub>2</sub> Zr(Si <sub>3</sub> O <sub>9</sub> ) · 2H <sub>2</sub> O                                             |                            |                | Ti                                             | [94]      |
| Clinohumite Mg <sub>9</sub> (SiO <sub>4</sub> )(OH) <sub>2</sub>                                                    | 500 (120)                  |                | TiO <sub>6</sub>                               | [29]      |
| Diopside                                                                                                            |                            |                |                                                |           |
| CaMgSi <sub>2</sub> O <sub>6</sub>                                                                                  | 415 (200)                  |                |                                                | [39]      |
| Hackmanite Na <sub>8</sub> (Al <sub>6</sub> Si <sub>6</sub> O <sub>24</sub> )Cl <sub>2</sub>                        | 460                        |                | F-center- Ti <sup>3+</sup><br>Ti <sup>4+</sup> | [27]      |
| Hectorite                                                                                                           |                            |                |                                                |           |
| (Br,<br>I)Na <sub>0.3</sub> (Mg <sub>2.7</sub> Li <sub>0.3</sub> )Si <sub>4</sub> O <sub>10</sub> (OH) <sub>2</sub> | 480                        |                | F-center- Ti <sup>3+</sup>                     | [95]      |
| Anatase                                                                                                             |                            |                |                                                |           |
| TiO <sub>2</sub>                                                                                                    | 480 (200)                  | --             | Ti <sup>4+</sup>                               | [1]       |
| Ti:Ca <sub>2</sub> SnO <sub>4</sub>                                                                                 | 445 (100)                  |                | TiO <sub>6</sub>                               | [96]      |
| Ti:CaYAlO <sub>4</sub>                                                                                              | 395 (120)                  |                | Ti <sup>4+</sup>                               | [97]      |
| Ti:Li <sub>4</sub> Ge <sub>5</sub> O <sub>12</sub>                                                                  | 450                        |                | Ti <sup>4+</sup>                               | [98]      |
| Ti:Sr <sub>2</sub> SnO <sub>4</sub>                                                                                 | 410 (150)                  |                | TiO <sub>6</sub>                               | [96]      |
| Ti:Y <sub>2</sub> SiO <sub>5</sub>                                                                                  | 400                        |                | Ti <sup>4+</sup>                               | [98]      |
| Ti:Zn <sub>2</sub> SiO <sub>4</sub>                                                                                 | 402                        |                |                                                | [99]      |
| Ti:ZnAl <sub>2</sub> O <sub>4</sub>                                                                                 | 490 (150)                  | 1.2 μs         | Ti <sup>4+</sup>                               | [100]     |
| Lorenzenite                                                                                                         |                            |                |                                                |           |
| Na <sub>2</sub> Ti <sub>2</sub> Si <sub>2</sub> O <sub>9</sub>                                                      | 520                        | 0.4 μs         |                                                | [29]      |
| Titanite                                                                                                            |                            |                |                                                |           |
| CaTiSiO <sub>5</sub>                                                                                                | 450 (100)                  |                |                                                | [29]      |
| lithium potassium borate glass                                                                                      | 478 (50)                   |                | Ti <sup>4+</sup>                               | [101]     |
| Phlogopite                                                                                                          |                            |                |                                                |           |
| KMg <sub>3</sub> (AlSi <sub>3</sub> O <sub>10</sub> )(OH) <sub>2</sub>                                              | 500 (150)                  | 50 μs          | TiO <sub>6</sub>                               | [29]      |
| Sorensenite                                                                                                         |                            |                |                                                |           |
| Na <sub>4</sub> SnBe <sub>2</sub> (Si <sub>3</sub> O <sub>9</sub> ) <sub>2</sub> · 2H <sub>2</sub> O                | 500                        |                | TiO <sub>6</sub>                               | [29]      |
| Natisite Na <sub>2</sub> TiO[SiO <sub>4</sub> ]                                                                     | 450 (150) and<br>510 (100) | --             |                                                | [29]      |

**Table S2.** Data associated with figure 5, mineral & formula, Ti-O distance, emission maxima (in nm and eV), bibliographic sources for luminescence and Ti-O distance [1,9,16,29,40,77,89–92,102–119].

| Mineral      | Formula                                                                                                     | Ti-O (Å)   | Emission maxima (nm) | Emission maxima (eV) | source luminescence | Ti-O distance source |
|--------------|-------------------------------------------------------------------------------------------------------------|------------|----------------------|----------------------|---------------------|----------------------|
| Benitoite    | BaTiSi <sub>3</sub> O <sub>9</sub>                                                                          | 1.949      | 420                  | 2.87                 | [9]                 | [102]                |
| Baratovite   | KLi <sub>3</sub> Ca <sub>7</sub> (Ti,Zr) <sub>2</sub> (SiO <sub>3</sub> ) <sub>12</sub> (OH,F) <sub>2</sub> | 1.949      | 406                  | 2.97                 | [16]                | [103]                |
| Katayamalite | KLi <sub>3</sub> Ca <sub>7</sub> Ti <sub>2</sub> (SiO <sub>3</sub> ) <sub>12</sub> (OH,F) <sub>2</sub>      | 1.94       | 406                  | 2.97                 | [16]                | [104]                |
| Lorenzite    | Na <sub>2</sub> Ti <sub>2</sub> O <sub>3</sub> (Si <sub>2</sub> O <sub>6</sub> )                            | 1.99       | 470                  | 2.56                 | [29]                | [105]                |
| Titanite     | CaTiSiO <sub>5</sub>                                                                                        | 1.959      | 450                  | 2.68                 | [29]                | [106]                |
| Penkvilksite | Na <sub>4</sub> Ti <sub>2</sub> Si <sub>8</sub> O <sub>22</sub> ·5H <sub>2</sub> O                          | 1.957      | 440                  | 2.74                 | [29]                | [107]                |
| Anatase      | TiO <sub>2</sub>                                                                                            | 1.9797     | 480                  | 2.51                 | [1]                 | [108]                |
| corundum     | Al <sub>2</sub> O <sub>3</sub>                                                                              | 1.95       | 415                  | 2.90                 | [40]                | [109]                |
|              | CaTiO <sub>3</sub>                                                                                          | 1.9547     | 462                  | 2.61                 | [90]                | [110]                |
| Natisite     | Na <sub>2</sub> Ti <sub>3</sub> O <sub>7</sub>                                                              | 1.99       | 450                  | 2.68                 | [29]                | [111]                |
|              | Li <sub>2</sub> TiSiO <sub>5</sub>                                                                          | 1.97       | 505                  | 2.38                 | [89]                | [112]                |
|              | Na <sub>2</sub> TiSiO <sub>5</sub>                                                                          | 1.99       | 490                  | 2.46                 | [89]                | [113]                |
|              | Na <sub>2</sub> TiOGeO <sub>4</sub>                                                                         | 2          | 425                  | 2.83                 | [89]                | [89]                 |
|              | NbPO <sub>5</sub>                                                                                           | 1.97       | 490                  | 2.46                 | [89]                | [114]                |
|              | LiTiPO <sub>5</sub>                                                                                         | 2.02       | 520                  | 2.32                 | [89]                | [115]                |
|              | BaTiO <sub>3</sub>                                                                                          | 2          | 490                  | 2.46                 | [89]                | [116]                |
|              | KTiPO <sub>5</sub>                                                                                          | 1.99       | 420                  | 2.87                 | [89]                | [117]                |
|              | LaNbTiO <sub>6</sub>                                                                                        | 1.98916667 | 470                  | 2.56                 | [91]                | [118]                |
|              | Na <sub>0.5</sub> Bi <sub>0.5</sub> TiO <sub>3</sub>                                                        | 1.959      | 445                  | 2.71                 | [92]                | [119]                |
|              | Ca <sub>14</sub> Al <sub>10</sub> Zn <sub>6</sub> O <sub>35</sub>                                           | 1.936      | 354                  | 3.40                 | [77]                | [77]                 |
|              | Ca <sub>14</sub> Al <sub>10</sub> Zn <sub>6</sub> O <sub>35</sub>                                           | 1.936      | 384                  | 3.14                 | [77]                | [77]                 |
